# Supplementary material for: Oleanolic Acid Acetate Alleviates Cisplatin-Induced Nephrotoxicity via Inhibition of Apoptosis and Necroptosis In Vitro and In Vivo
Source: MDPI journal article supplement (doi:10.3390/toxics12040301), 2024-04-18
Supplement: s1 [file s1]

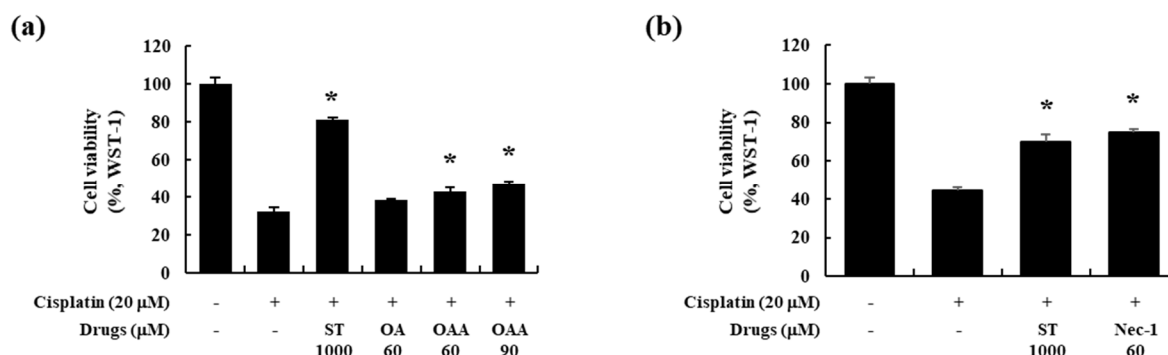

**Figure S1.** Effect of OAA on cell death in cisplatin-exposed TCMK-1 cells. Viability of TCMK-1 cells was analyzed using WST analysis after pretreatment with various concentrations of OAA or OA, followed by stimulation with cisplatin for 21 h (a). Viability of TCMK-1 cells was analyzed using WST analysis after pretreatment of Nec-1, followed by stimulation with cisplatin for 21 h (b). All data are presented as mean  $\pm$  SD of three independent experiments. \* $p < 0.05$ , significantly different from cisplatin-treated group.

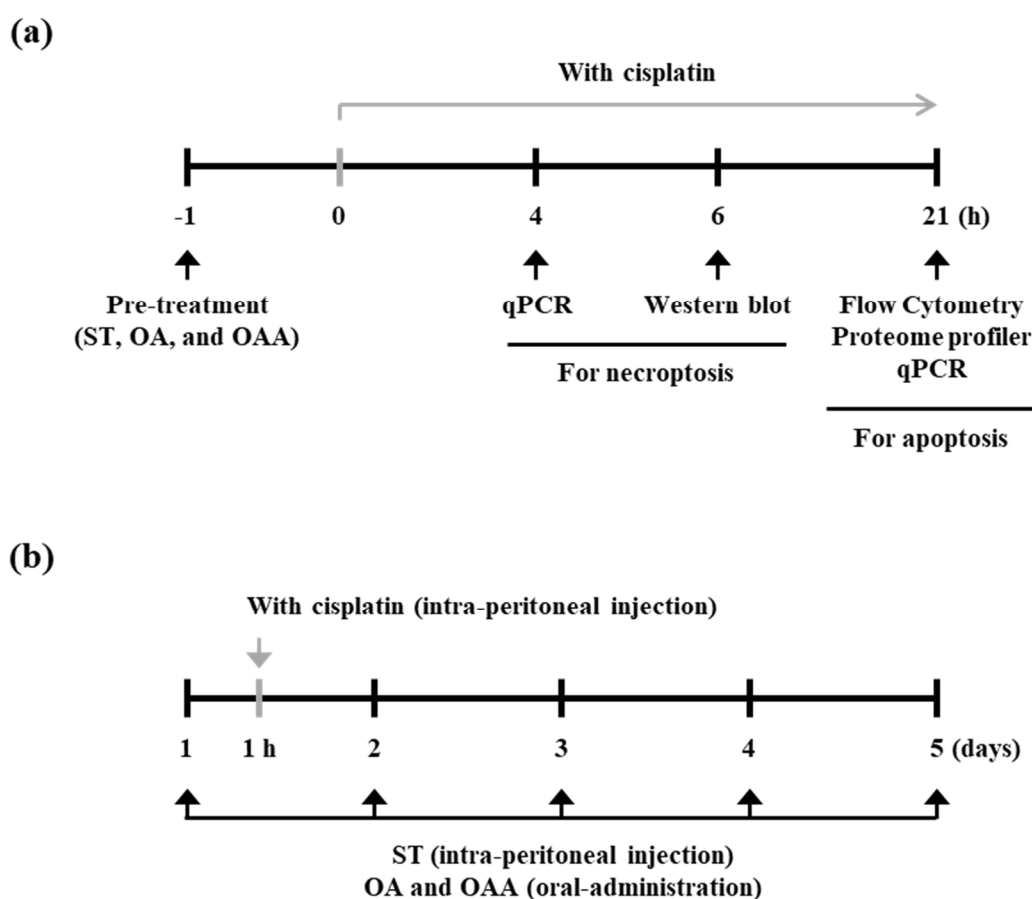

**Figure S2.** Schematic representation of the experimental design. TCMK-1 cells were treated with ST, OA, and OAA for 1 h and were subsequently stimulated with cisplatin. After 4 h, the cells were harvested for qPCR. After 6 h, the cells were harvested for Western blot. After 21 h, the cells were harvested for apoptosis assay (a). OA and OAA were orally administered once daily for 5 days. ST was intraperitoneally injected once daily for 5 days. Cisplatin was intraperitoneally injected at 1 h after drug administration on the first day (b).

(a)

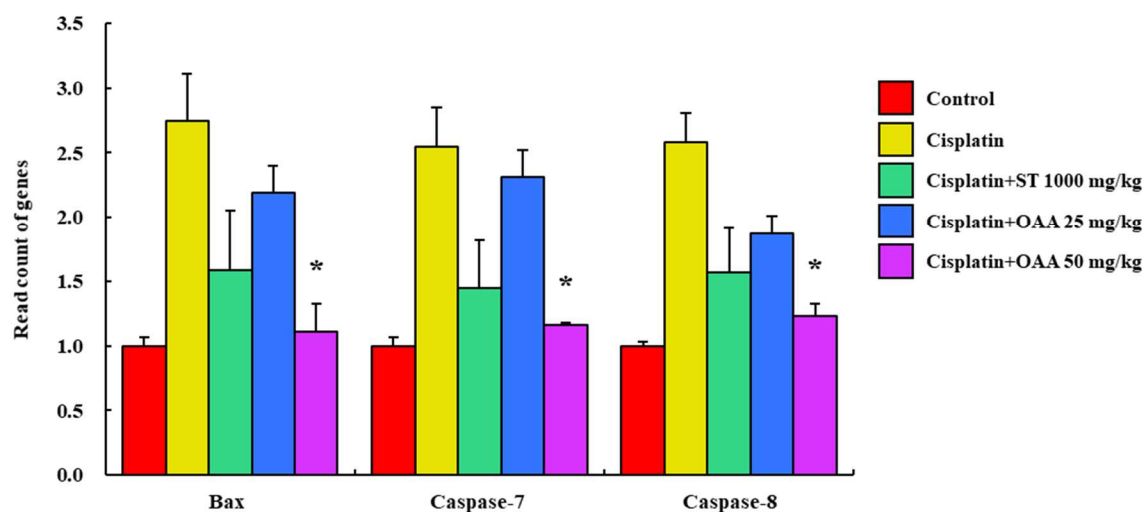

**Figure S3.** Effect of OAA on apoptosis-related gene expression in a mouse model of cisplatin-induced nephrotoxicity. Read count of apoptosis-related gene, such as *Bax*, *caspase7*, and *caspase8*, in RNA sequencing result. All data are presented as mean  $\pm$  SD. \* $p < 0.05$ , significantly different from the cisplatin-treated group.

(a)

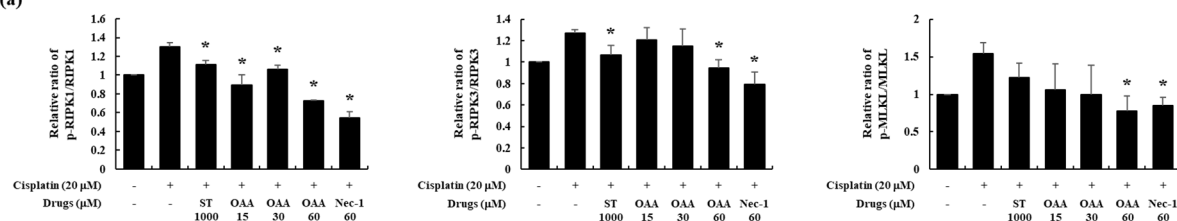

(b)

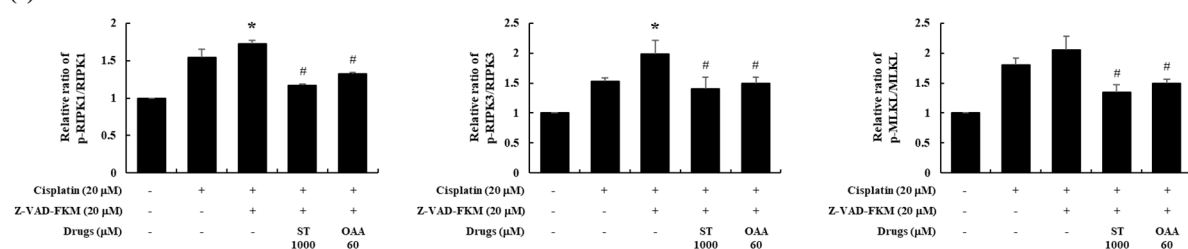

**Figure S4.** The relative density of the Western blot bands of cisplatin-treated TCMK-1 cells. The Western blot bands were quantified using densitometry. The related ratios of p-RIPK1/RIPK1, p-RIPK3/RIPK3, and p-MLKL/MLKL are indicated in Figure 5b (a) and Figure 5c (b). All data are presented as mean  $\pm$  SD of three independent experiments. \* $p < 0.05$ , significantly different from the cisplatin-treated group. # $p < 0.05$ , significantly different from Z-VAD-FKM and the cisplatin co-treated group.

**Table S1.** Criteria for histological scores.

| Score | Grade      | Overview                                                                  | Glomeruli                                                               | Tubules                                                                                                                                                         |
|-------|------------|---------------------------------------------------------------------------|-------------------------------------------------------------------------|-----------------------------------------------------------------------------------------------------------------------------------------------------------------|
| 1     | Normal     | Normal                                                                    | Normal                                                                  | Normal                                                                                                                                                          |
| 2     | Mild       | More or less normal aspect<br>High glomerular cell count                  | Apoptosis of endothelium cells<br>Inflammatory infiltrate               | Little dilation<br>Normal basal membrane<br>No protein cylinders                                                                                                |
| 3     | Moderate   | Tubular dilation<br>Tubular cell damage                                   | Same as grade 1                                                         | Apoptotic cells<br>More pronounced dilation<br>Thickened basal membrane<br>Little tubular protein cylinders<br>Regenerating cells (mitotic activity)            |
| 4     | Pronounced | Stronger tubular dilation<br>Cell-rich infiltrate<br>Regenerating tubules | Smaller vascular lumina<br>Few erythrocytes                             | Flat epithelium<br>Partly, complete loss of epithelium<br>Stronger dilation<br>Inflammatory infiltrate<br>Regeneration present<br>More thickened basal membrane |
| 5     | Severe     | Severe tubular dilation                                                   | Same as grade 3<br>More optical empty space due to glomerular shrinkage | Same as grade 3, but more empty cylinders<br>Peripheral fibrosis                                                                                                |
